# Supplementary material for: An insight into the effect of nitrogen doping on the performance of a reduced graphene oxide counter electrode for dye-sensitized solar cells
Source: Royal Society of Chemistry journal article supplement (doi:10.1039/c3ra40847g), 2013-01-01
Supplement: c3ra40847g.pdf [file c3ra40847g.pdf]

Cite this: DOI: 10.1039/c0xx00000x

www.rsc.org/xxxxxx

ARTICLE TYPE

# An Insight on the Effect of Nitrogen Doping on the Performance of Reduced Graphene Oxide Counter Electrode for Dye-Sensitized Solar Cells

Xiaoying Zhang,<sup>a,b</sup> Shuping Pang,<sup>a</sup> Xiao Chen,<sup>a</sup> Kejun Zhang,<sup>a,b</sup> Zhihong Liu,<sup>a</sup> Xinhong Zhou,<sup>c</sup>  
Guanglei Cui <sup>\*a</sup>

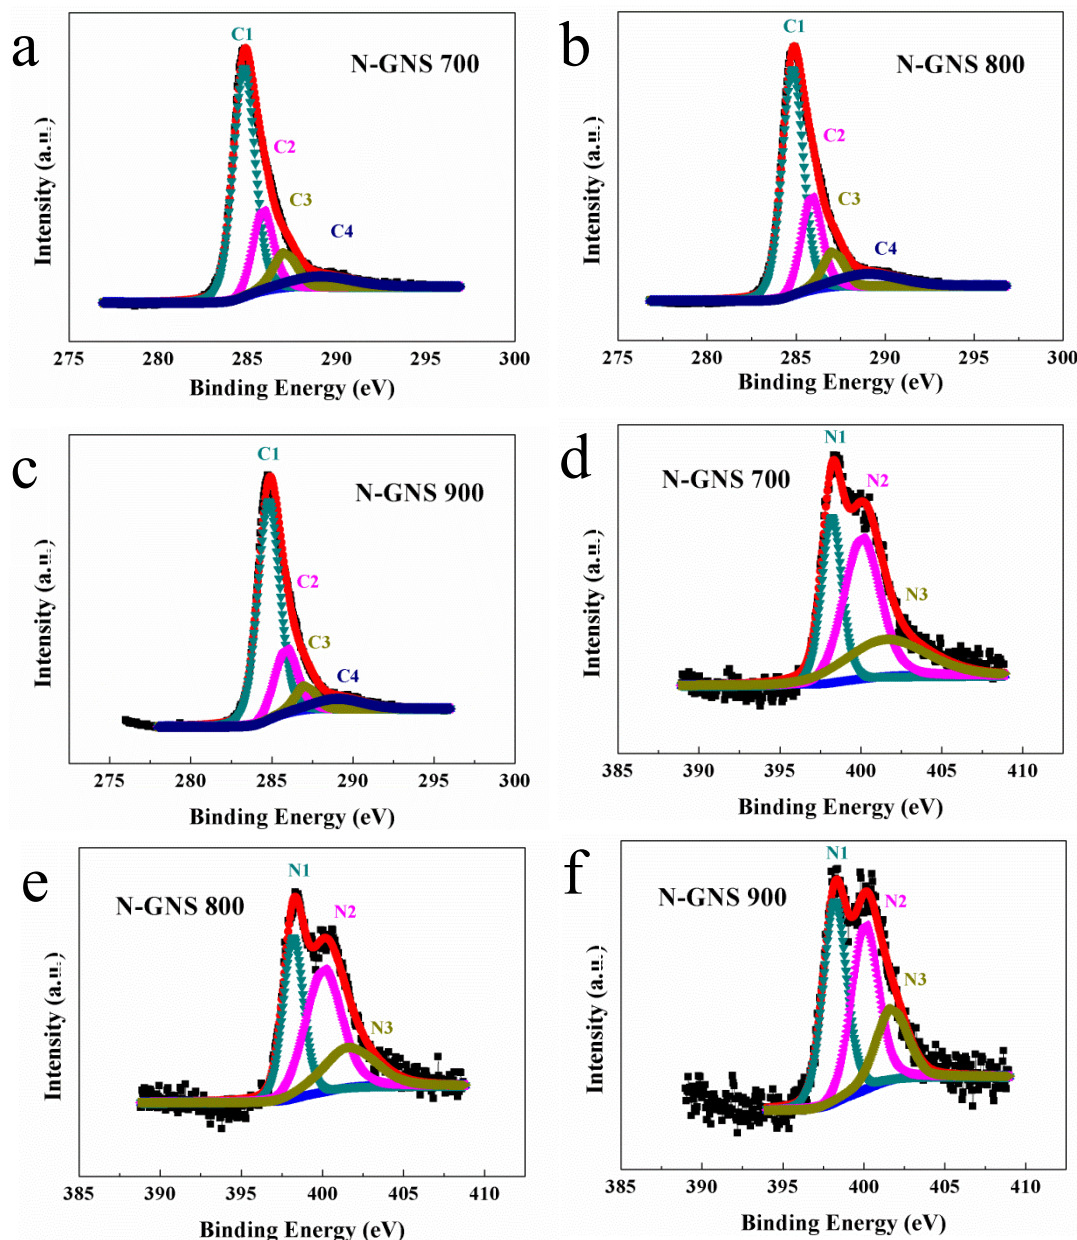

Fig. 1S High-resolution C1s and N1s XPS spectra for N-GNS 700 (a and d), N-GNS 800 (b and e) and N-GNS 900 (c and f).

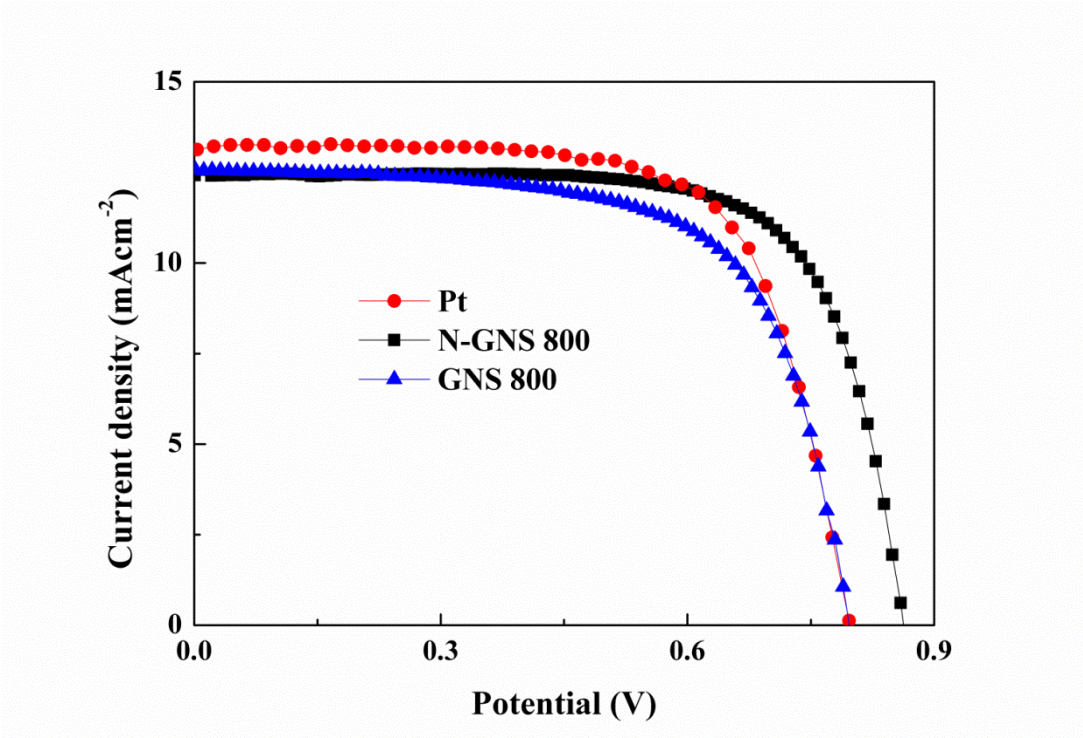

Fig. 2S Photocurrent-voltage (I-V) curves of the DSCs with different CEs of N-GNS 800, GNS 800 and Pt under 1 sun (AM 1.5) illumination.

The photovoltaic performances of DSCs dependant on N-GNS CE are evaluated in contrast to the Pt and GNS CE cell (Fig. 2S) and the detailed parameters are summarized in Table 2S. Under illumination, the photovoltaic characteristics of device equipped with N-GNS 800 CE are  $V_{OC}$  0.864 V,  $J_{SC}$  12.42 mA cm<sup>-2</sup>, FF 0.72 and  $\eta$  7.69 %, while those of the device with GNS 800 CE are  $V_{OC}$  0.795 V,  $J_{SC}$  12.62 mA cm<sup>-2</sup>, FF 0.67 and  $\eta$  6.77 %. Obviously, the  $V_{OC}$  value of the N-GNS 800 cell is larger by 60 mV than that of the GNS 800 CE cell. These differences indicate the positive effect of the N-doping on the photoelectrochemical performance.

Table 1S Fitted electrochemical parameters from Electrochemical Impedance Spectra (EIS)

|          | N-GNS 600 | N-GNS 700 | N-GNS 800 | N-GNS 900 |
|----------|-----------|-----------|-----------|-----------|
| $R_s$    | 0.512     | 0.496     | 0.506     | 0.503     |
| $Q$      | 7.03      | 9.36      | 12.44     | 17.28     |
| $n$      | 0.82      | 0.79      | 0.77      | 0.76      |
| $R_{ct}$ | 5.76      | 7.93      | 9.07      | 12.97     |
| $O$      | 0.690     | 0.036     | 0.039     | 0.048     |
| $B$      | 0.205     | 0.202     | 0.151     | 0.084     |
| $O$      | 0.04      | 0.50      | 0.46      | 0.29      |
| $B$      | 0.28      | 5.39      | 1.08      | 0.03      |

Table 2S Photovoltaic parameters of the DSCs using N-GNS 800, GNS 800 and Pt CEs

| Samples   | Voc (V) | Jsc (mA cm <sup>-2</sup> ) | FF (%) | $\eta$ (%) |
|-----------|---------|----------------------------|--------|------------|
| Pt        | 0.796   | 13.26                      | 69.39  | 7.33       |
| N-GNS 800 | 0.864   | 12.42                      | 71.89  | 7.69       |
| GNS 800   | 0.795   | 12.62                      | 67.43  | 6.77       |
